# Supplementary material for: Postovulatory ageing modifies sperm-induced Ca2+ oscillations in mouse oocytes through a conditions-dependent, multi-pathway mechanism
Source: PubMed Central journal article supplement (PMC6694115; doi:10.1038/s41598-019-48281-3), 2019-08-14

**SUPPLEMENTARY INFORMATION**

for

„Postovulatory ageing modifies sperm-induced Ca<sup>2+</sup> oscillations in mouse oocytes through a conditions-dependent, multi-pathway mechanism”

Marcin Szpila, Agnieszka Walewska, Dorota Sabat-Pośpiech, Patrycja Strączyńska, Takao Ishikawa, Robert Milewski, Katarzyna Szczepańska and Anna Ajduk

**Supplementary Table S1. Effect of the cell cycle status on the pattern of Ca<sup>2+</sup> oscillations in oocytes aged for 25 hrs *in vitro* and *in vivo***

|                                                                                      | 25 hrs <i>in vitro</i>                               |                                                      | 25 hrs <i>in vivo</i>                                      |                                                           |
|--------------------------------------------------------------------------------------|------------------------------------------------------|------------------------------------------------------|------------------------------------------------------------|-----------------------------------------------------------|
|                                                                                      | M-phase-arrested                                     | Progressing to interphase                            | M-phase-arrested                                           | Progressing to interphase                                 |
|                                                                                      | <b>Median (Q1;Q3)</b>                                |                                                      |                                                            |                                                           |
| No. of Ca <sup>2+</sup> transients                                                   | <b>9.0</b><br>(7.5; 10.5)<br><i>n</i> =11            | <b>7.0</b><br>(6.0; 9.0)<br><i>n</i> =19             | <b>14.0</b><br>(9.5; 24.3)<br><i>n</i> =20                 | <b>9.0</b><br>(5.5; 15)<br><i>n</i> =23                   |
| Duration of Ca <sup>2+</sup> oscillations (min)                                      | <b>199.1</b><br>(144.4; 242.9)<br><i>n</i> =11       | <b>130.2</b><br>(97.9; 185.0)<br><i>n</i> =19        | <b>246.4<sup>b</sup></b><br>(185.2; 329.1)<br><i>n</i> =19 | <b>125.0<sup>b</sup></b><br>(80.7; 188.5)<br><i>n</i> =23 |
| Mean interval between Ca <sup>2+</sup> transients during 1 <sup>st</sup> 2 hrs (min) | <b>24.4</b><br>(14.4; 26.3)<br><i>n</i> =11          | <b>18.8</b><br>(15.6; 23.9)<br><i>n</i> =19          | <b>13.5</b><br>(10.3; 19.2)<br><i>n</i> =19                | <b>14.5</b><br>(9.8; 21.6)<br><i>n</i> =23                |
| Amplitude of the 1 <sup>st</sup> Ca <sup>2+</sup> transient ( $\Delta F/F_0$ )       | <b>0.7</b><br>(0.6; 0.8)<br><i>n</i> =11             | <b>0.7</b><br>(0.5; 0.8)<br><i>n</i> =19             | <b>0.5</b><br>(0.5; 0;7)<br><i>n</i> =20                   | <b>0.6</b><br>(0.5; 0.6)<br><i>n</i> =23                  |
| Amplitude of the 3 <sup>rd</sup> Ca <sup>2+</sup> transient ( $\Delta F/F_0$ )       | <b>0.7</b><br>(0.6; 0.7)<br><i>n</i> =11             | <b>0.7</b><br>(0.6; 0.7)<br><i>n</i> =19             | <b>0.6</b><br>(0.5; 0.6)<br><i>n</i> =19                   | <b>0.6</b><br>(0.5; 0.7)<br><i>n</i> =22                  |
| Duration of the 1 <sup>st</sup> Ca <sup>2+</sup> transient (min)                     | <b>1.5<sup>a</sup></b><br>(1.2; 1.6)<br><i>n</i> =11 | <b>1.7<sup>a</sup></b><br>(1.5; 2.0)<br><i>n</i> =19 | <b>2.2</b><br>(2.0; 2.6)<br><i>n</i> =20                   | <b>2.3</b><br>(1.8; 3.3)<br><i>n</i> =23                  |
| Duration of the 3 <sup>rd</sup> Ca <sup>2+</sup> transient (min)                     | <b>1.0</b><br>(0.8; 1.0)<br><i>n</i> =11             | <b>1.0</b><br>(1.0; 1.2)<br><i>n</i> =19             | <b>1.0</b><br>(1.0; 1.2)<br><i>n</i> =19                   | <b>0.8</b><br>(0.8; 1.0)<br><i>n</i> =22                  |
| Rate of the 1 <sup>st</sup> Ca <sup>2+</sup> increase (min <sup>-1</sup> )           | <b>3.4</b><br>(2.8; 4.2)<br><i>n</i> =11             | <b>3.0</b><br>(2.0; 3.2)<br><i>n</i> =19             | <b>2.1</b><br>(1.4; 2.2)<br><i>n</i> =20                   | <b>2.0</b><br>(1.8; 2.4)<br><i>n</i> =23                  |
| Rate of the 3 <sup>rd</sup> Ca <sup>2+</sup> increase (min <sup>-1</sup> )           | <b>3.7</b><br>(3.5; 4.0)<br><i>n</i> =11             | <b>3.7</b><br>(3.2; 4.0)<br><i>n</i> =19             | <b>3.0</b><br>(2.7; 3.4)<br><i>n</i> =19                   | <b>3.1</b><br>(3.1; 3.3)<br><i>n</i> =22                  |
| Rate of the 1 <sup>st</sup> Ca <sup>2+</sup> decrease (min <sup>-1</sup> )           | <b>-2.7</b><br>(-3.1; -2.1)<br><i>n</i> =11          | <b>-2.3</b><br>(-3.5; -1.8)<br><i>n</i> =19          | <b>-2.6</b><br>(-3.1; -1.8)<br><i>n</i> =20                | <b>-2.8</b><br>(-3.1; -2.1)<br><i>n</i> =23               |
| Rate of the 3 <sup>rd</sup> Ca <sup>2+</sup> decrease (min <sup>-1</sup> )           | <b>-3.6</b><br>(-3.7; -3.2)<br><i>n</i> =11          | <b>-3.3</b><br>(-3.9; -2.8)<br><i>n</i> =19          | <b>-3.1</b><br>(-3.8; -2.8)<br><i>n</i> =19                | <b>-3.3</b><br>(-3.7; -3.0)<br><i>n</i> =22               |

Values marked with the same letter are significantly different: <sup>a,b</sup>*p*<0.01,

**Supplementary Table S2. Effect of cumulus cells and Ca<sup>2+</sup>-independent parthenogenetic activation on the pattern of Ca<sup>2+</sup> oscillations and the ER Ca<sup>2+</sup> store in oocytes**

|                                                                                      | 9 hrs <i>in vitro</i><br>+ CC                                 | fresh<br>+ 6-DMAP + CHX                                                |
|--------------------------------------------------------------------------------------|---------------------------------------------------------------|------------------------------------------------------------------------|
|                                                                                      | <b>Median (Q1;Q3)</b>                                         |                                                                        |
| No. of Ca <sup>2+</sup> transients                                                   | <b>9.0</b> <sup>a,ddd</sup><br>(8.0; 10.0)<br><i>n</i> =67    | <b>6.0</b> <sup>bbb,c,eee</sup><br>(5.0; 7.0)<br><i>n</i> =62          |
| Duration of Ca <sup>2+</sup> oscillations (min)                                      | <b>146.1</b> <sup>ddd</sup><br>(135.9; 160.9)<br><i>n</i> =67 | <b>120.0</b> <sup>a,b,eee</sup><br>(63.2; 162.4)<br><i>n</i> =61       |
| Mean interval between Ca <sup>2+</sup> transients during 1 <sup>st</sup> 2 hrs (min) | <b>17.0</b> <sup>aaa</sup><br>(15.1; 19.5)<br><i>n</i> =67    | <b>21.1</b> <sup>d,eee</sup><br>(18.3; 24.0)<br><i>n</i> =61           |
| Amplitude of the 1 <sup>st</sup> Ca <sup>2+</sup> transient ( $\Delta F/F_0$ )       | <b>0.8</b> <sup>ddd,eee</sup><br>(0.7; 0.9)<br><i>n</i> =67   | <b>1.2</b> <sup>bbb,ccc,ddd,eee</sup><br>(1.0; 1.3)<br><i>n</i> =60    |
| Amplitude of the 3 <sup>rd</sup> Ca <sup>2+</sup> transient ( $\Delta F/F_0$ )       | <b>0.8</b> <sup>c,eee</sup><br>(0.7; 0.8)<br><i>n</i> =67     | <b>1.0</b> <sup>aa,bbb,ccc,ddd,eee</sup><br>(1.0; 1.1)<br><i>n</i> =56 |
| Duration of the 1 <sup>st</sup> Ca <sup>2+</sup> transient (min)                     | <b>2.7</b> <sup>ccc</sup><br>(2.2; 3.2)<br><i>n</i> =67       | <b>2.4</b> <sup>aaa,c,d</sup><br>(2.0; 2.7)<br><i>n</i> =60            |
| Duration of the 3 <sup>rd</sup> Ca <sup>2+</sup> transient (min)                     | <b>1.2</b> <sup>c,eee</sup><br>(1.2; 1.3)<br><i>n</i> =67     | <b>1.1</b><br>(1.0; 1.3)<br><i>n</i> =56                               |
| Rate of the 1 <sup>st</sup> Ca <sup>2+</sup> increase (min <sup>-1</sup> )           | <b>3.4</b> <sup>ddd,eee</sup><br>(2.8; 4.2)<br><i>n</i> =67   | <b>2.4</b> <sup>bbb</sup><br>(1.5; 3.5)<br><i>n</i> =59                |
| Rate of the 3 <sup>rd</sup> Ca <sup>2+</sup> increase (min <sup>-1</sup> )           | <b>4.3</b> <sup>eee</sup><br>(3.9; 4.6)<br><i>n</i> =67       | <b>3.4</b> <sup>aaa,e</sup><br>(2.8; 5.5)<br><i>n</i> =56              |
| Rate of the 1 <sup>st</sup> Ca <sup>2+</sup> decrease (min <sup>-1</sup> )           | <b>-3.3</b> <sup>aa</sup><br>(-3.5; -2.9)<br><i>n</i> =67     | <b>-3.2</b> <sup>aa,e</sup><br>(-4.4; -2.5)<br><i>n</i> =60            |
| Rate of the 3 <sup>rd</sup> Ca <sup>2+</sup> decrease (min <sup>-1</sup> )           | <b>-4.3</b> <sup>cc,eee</sup><br>(-4.5; -3.8)<br><i>n</i> =67 | <b>-3.5</b> <sup>aaa</sup><br>(-5.8; -3.0)<br><i>n</i> =56             |
| Amplitude of the TG-induced Ca <sup>2+</sup> release ( $\Delta F/F_0$ )              | <b>1.2</b> <sup>a,b,c,e</sup><br>(1.2; 1.2)<br><i>n</i> =42   | <i>n</i> /a                                                            |

<sup>aaa</sup>*p*<0.001, <sup>aa</sup>*p*<0.01, <sup>a</sup>*p*<0.05 vs. fresh oocytes

<sup>bbb</sup>*p*<0.001, <sup>bb</sup>*p*<0.01, <sup>b</sup>*p*<0.05 vs. 9h *in vitro*

<sup>ccc</sup>*p*<0.001, <sup>cc</sup>*p*<0.01, <sup>c</sup>*p*<0.05 vs. 25h *in vitro*

<sup>ddd</sup>*p*<0.001, <sup>dd</sup>*p*<0.01, <sup>d</sup>*p*<0.05 vs. 9h *in vivo*

<sup>eee</sup>*p*<0.001, <sup>ee</sup>*p*<0.01, <sup>e</sup>*p*<0.05 vs. 25h *in vivo*

## Supplementary figure legends

### Supplementary Fig. S1 Fertilization-induced $\text{Ca}^{2+}$ oscillations in freshly ovulated and postovulatory aged oocytes

(A)  $\text{Ca}^{2+}$  trace representative for fresh oocytes. (B) Magnification of the 1<sup>st</sup>  $\text{Ca}^{2+}$  transient from (A) and a schematic representation of how the  $\text{Ca}^{2+}$  increase rate was calculated ( $\text{Ca}^{2+}$  decrease rate was calculated analogically). (C-F)  $\text{Ca}^{2+}$  traces representative for oocytes aged for 9 hrs *in vitro* (C), 9 hrs *in vivo* (D), 25 hrs *in vitro* (E) and 25 hrs *in vivo* (F). In case of (E-F), two of the most frequently occurring types of  $\text{Ca}^{2+}$  oscillations were presented.

### Supplementary Fig. S2 Dynamics of the 3<sup>rd</sup> fertilization-induced $\text{Ca}^{2+}$ transient and IP3R1 and SERCA2 expression in postovulatory aged oocytes

(A-B) Point charts presenting the amplitude and the duration of the 3<sup>rd</sup>  $\text{Ca}^{2+}$  transient in freshly ovulated oocytes and oocytes aged for 9 and 25 hrs *in vitro* (A) and *in vivo* (B). (C-D) Point charts presenting the rates of  $\text{Ca}^{2+}$  increase and decrease during the 3<sup>rd</sup>  $\text{Ca}^{2+}$  transient in freshly ovulated oocytes and oocytes aged for 9 and 25 hrs *in vitro* (C) and *in vivo* (D). (A-D) Each dot represents one oocyte, the number of analysed oocytes is included in Table 1. (E) Original images of the Western blots showing expression of IP3R1 and SERCA2 proteins in brain lysate, freshly ovulated oocytes, oocytes aged for 9 and 25 hrs *in vitro* and *in vivo* and two other samples unrelated to this paper. The red line marks regions showed in Fig. 2 E as blots labelled for IP3R1 and SERCA2, blue line – a region showed in the Ponceau S staining.

### Supplementary Fig. S3 Effect of cumulus cells on $\text{Ca}^{2+}$ homeostasis in postovulatory aged oocytes.

(A) The mean  $\text{Ca}^{2+}$  release triggered by thapsigargin (TG), calculated for oocytes aged for 9 hrs *in vivo* and *in vitro* with and without cumulus cells (CC). The number of analysed oocytes is included in Tables 1 and 2. Mean values +/- SD are shown. Time-point "0" was set as a moment when the cytoplasmic  $\text{Ca}^{2+}$  concentration in oocytes started to rise. (B)  $\text{Ca}^{2+}$  trace representative for oocytes aged for 9 hrs *in vitro* with CC. (C-G) Point charts presenting the total duration of the  $\text{Ca}^{2+}$  oscillations and the mean interval between  $\text{Ca}^{2+}$  transients (C), the amplitude and the duration of the 1<sup>st</sup>  $\text{Ca}^{2+}$  transient (D), the amplitude and the duration of the 3<sup>rd</sup>  $\text{Ca}^{2+}$  transient (E), the rates of  $\text{Ca}^{2+}$  increase and decrease during the 1<sup>st</sup>  $\text{Ca}^{2+}$  transient (F), and the rates of  $\text{Ca}^{2+}$  increase and decrease during the 3<sup>rd</sup>  $\text{Ca}^{2+}$  transient (G) in oocytes aged for 9 hrs *in vivo* or *in vitro* with and without CC. Each dot represents one oocyte, the number of analysed oocytes is included in Tables 1 and Supplementary Table S2.

### Supplementary Fig. S4 Effect of oxidative stress on Ca<sup>2+</sup> ER store and fertilization-induced Ca<sup>2+</sup> oscillations in oocytes

(A) The Ca<sup>2+</sup> release triggered by thapsigargin (TG) and A23187 ionophore in representative freshly ovulated oocytes pre-treated with H<sub>2</sub>O<sub>2</sub>. Arrow indicates when TG or ionophore was added. (B) Ca<sup>2+</sup> trace representative for fresh oocytes pre-treated with H<sub>2</sub>O<sub>2</sub>. (C-D) Point charts presenting the amplitude and the duration of the 3<sup>rd</sup> Ca<sup>2+</sup> transient (C) and the rates of Ca<sup>2+</sup> increase and decrease during the 3<sup>rd</sup> Ca<sup>2+</sup> transient (D) in fresh oocytes, fresh oocytes pre-treated with H<sub>2</sub>O<sub>2</sub> or oocytes aged for 25 hrs *in vitro*. (E) The mean Ca<sup>2+</sup> release triggered by thapsigargin (TG), calculated for freshly ovulated oocytes or oocytes aged for 25 hrs *in vitro* with and without *N*-acetylcysteine (NAC). The number of analysed oocytes is included in Tables 1 and 2. Mean values +/- SD are shown. Time-point "0" was set as a moment when the cytoplasmic Ca<sup>2+</sup> concentration in oocytes started to rise. (F) Ca<sup>2+</sup> trace representative for oocytes aged for 25 hrs *in vitro* with NAC. (G-H) Point charts presenting the amplitude and the duration of the 3<sup>rd</sup> Ca<sup>2+</sup> transient (G) and the rates of Ca<sup>2+</sup> increase and decrease during the 3<sup>rd</sup> Ca<sup>2+</sup> transient (H) in fresh oocytes and oocytes aged for 25 hrs *in vitro* with and without *N*-acetylcysteine (NAC). (C-D, G-H) Each dot represents one oocyte, the number of analysed oocytes is included in Tables 1 and 2.

### Supplementary Fig. S5 Specificity of TMRE and MgGreen stainings

(A-B) Mg<sup>2+</sup> (MgGreen in blue) and Ca<sup>2+</sup> (Rhod-2 in orange) traces recorded for oocytes subjected to FCCP (A) or thapsigargin (TG) (B). Arrows indicate when FCCP or TG was added. (C) Confocal image of a representative oocyte stained with MgGreen, displaying predominantly cytoplasmic localization of the dye. Although there are some signs of potential internalization of the dye (arrowheads), it does not form a pattern typical for ER cistern distribution (see Fig. 4E). Scale bar 50 μm.

### Supplementary Fig. S6 Effect of postovulatory ageing on the readjustment of ATP production during Ca<sup>2+</sup> oscillations.

(A-D) Mg<sup>2+</sup> (MgGreen in blue) and Ca<sup>2+</sup> (Rhod-2 in orange) oscillations in representative oocytes aged for 9 hrs *in vitro* (A) or *in vivo* (B) and for 25 hrs *in vitro* (C) or *in vivo* (D). The cytoplasmic concentration of free Mg<sup>2+</sup> ions is inversely proportional to the ATP concentration. (E) A decrease in the Mg<sup>2+</sup> concentration, indicative of an increase in the ATP concentration, during the 1<sup>st</sup> Ca<sup>2+</sup> transient (value 'a' – value 'b' in Fig. 4 C) calculated for freshly ovulated oocytes (n=31), oocytes aged *in vitro* for 9 and 25 hrs (n=25 and 11, respectively) and oocytes aged *in vivo* for 9 and 25 hrs (n=18 and 32). <sup>a</sup>p<0.05, <sup>b</sup>p<0.001 vs. fresh oocytes. (F) A decrease in the Mg<sup>2+</sup> concentration, indicative of an increase in the ATP concentration, during the 3<sup>rd</sup> Ca<sup>2+</sup> transient (value 'c' – value 'd' in Fig. 4 C) calculated for freshly ovulated oocytes (n=31), oocytes aged *in vitro* for 9 and 25 hrs (n=25 and 10,

respectively) and oocytes aged *in vivo* for 9 and 25 hrs (n=15 and 29). <sup>a</sup>p<0.001, <sup>b</sup>p<0.01 vs. fresh oocytes, <sup>c</sup>p<0.001 vs. 9 hrs *in vitro*. **(A-B)** Graphs present medians and the 1<sup>st</sup> and the 3<sup>rd</sup> quartile values. The ends of the whiskers are set at 1.5\*IQR above the third quartile and 1.5\*IQR below the first quartile. Dots show the minimum and maximum values if they are outside the range (outliers).

#### **Supplementary Fig. S7 Effect of actin depolymerisation on fertilization-induced Ca<sup>2+</sup> oscillations in oocytes**

**(A)** Ca<sup>2+</sup> trace for a representative fresh oocyte treated with cytochalasin D (CCD). **(B-C)** Point charts presenting the amplitude and the duration of the 3<sup>rd</sup> Ca<sup>2+</sup> transient **(B)** and the rates of Ca<sup>2+</sup> increase and decrease during the 3<sup>rd</sup> Ca<sup>2+</sup> transient **(C)** in freshly ovulated oocytes treated with CCD, and oocytes aged for 25 hrs *in vitro* and *in vivo*. Blue ovals indicate regions, where dots representing freshly ovulated oocytes would have been located. Each dot represents one oocyte, the number of analysed oocytes is included in Tables 1 and 2.

#### **Supplementary Fig. S8 Effect of parthenogenetic activation with EtOH on fertilization-induced Ca<sup>2+</sup> oscillations in oocytes**

**(A)** Images of fresh oocytes, oocytes aged for 9 hrs *in vivo*, and fresh oocytes activated with ethanol (EtOH) or 6-DMAP and cycloheximide (CHX) used for the recording of Ca<sup>2+</sup> oscillations. Images were taken just before fertilization. Asterisks indicate forming 2<sup>nd</sup> polar bodies and arrowheads – anaphase bulges. Scale bar 100 μm. **(B)** Ca<sup>2+</sup> trace for a representative fresh oocyte pre-activated with EtOH. **(C-D)** Point chart presenting the amplitude and the duration of the 3<sup>rd</sup> Ca<sup>2+</sup> transient **(C)** and the rates of Ca<sup>2+</sup> increase and decrease during the 3<sup>rd</sup> Ca<sup>2+</sup> transient **(D)** in freshly ovulated oocytes, oocytes pre-activated with EtOH and oocytes aged for 9 hrs *in vivo*. **(A-D)** Each dot represents one oocyte, numbers of analysed oocytes are included in Tables 1 and 2.

#### **Supplementary Fig. S9 Effect of parthenogenetic activation with 6-DMAP and cycloheximide on fertilization-induced Ca<sup>2+</sup> oscillations in oocytes**

**(A)** Ca<sup>2+</sup> trace for a representative fresh oocyte pre-activated with 6-DMAP and cycloheximide (CHX). **(B-F)** Point charts presenting the total duration of Ca<sup>2+</sup> oscillations and the mean interval between Ca<sup>2+</sup> transients **(B)**, the amplitude and the duration of the 1<sup>st</sup> Ca<sup>2+</sup> transient **(C)**, the amplitude and the duration of the 3<sup>rd</sup> Ca<sup>2+</sup> transient **(D)**, the rates of Ca<sup>2+</sup> increase and decrease during the 1<sup>st</sup> Ca<sup>2+</sup> transient **(E)**, and the rates of Ca<sup>2+</sup> increase and decrease during the 3<sup>rd</sup> Ca<sup>2+</sup> transient **(F)** in freshly ovulated oocytes, oocytes pre-activated with 6-DMAP and CHX and oocytes aged for 9 hrs *in vivo*. Each dot represents one oocyte, numbers of analysed oocytes are included in Tables 1 and Supplementary Table S2.

# Supplementary Figure S1

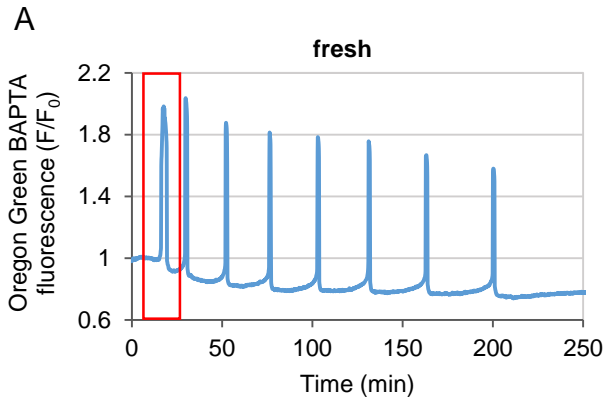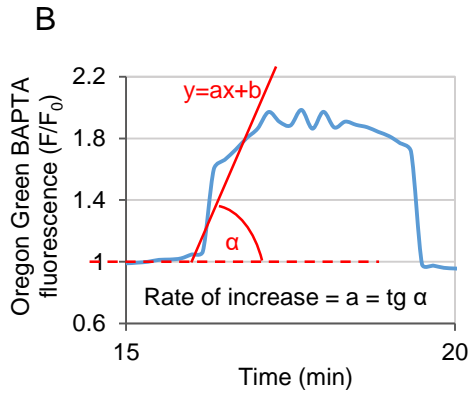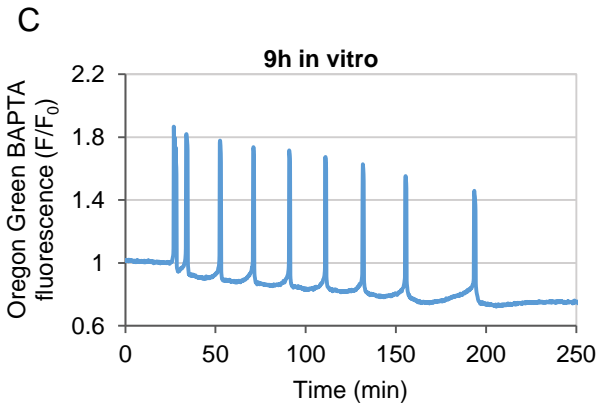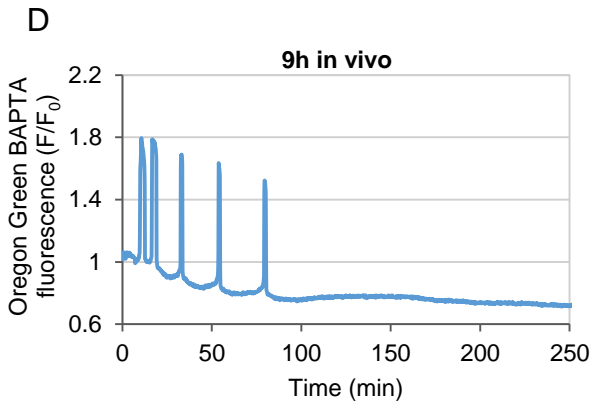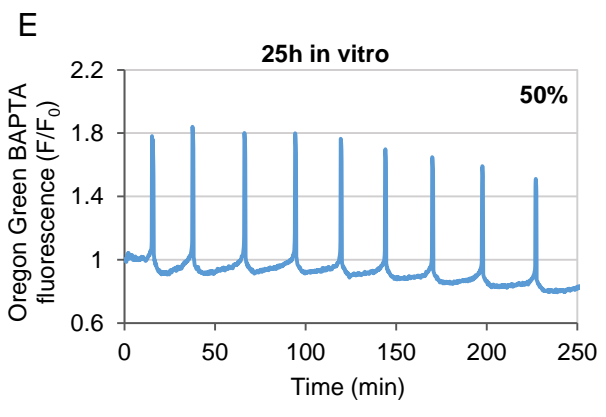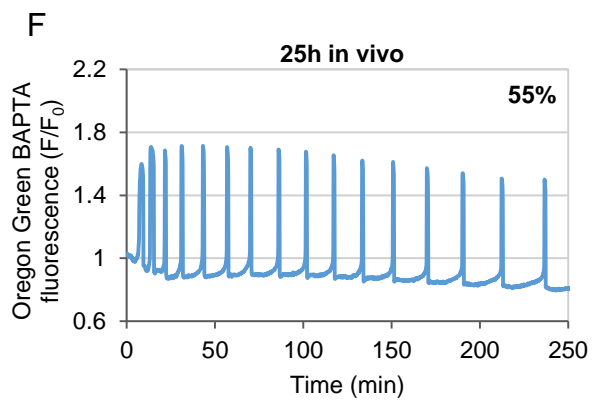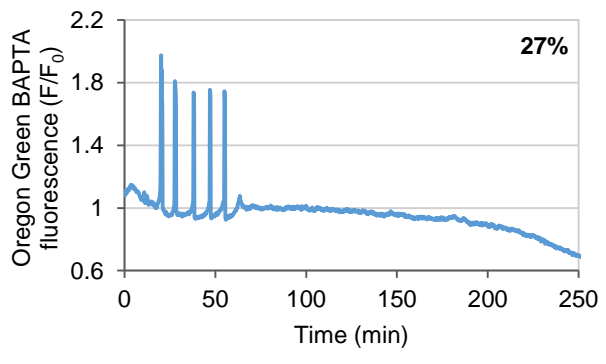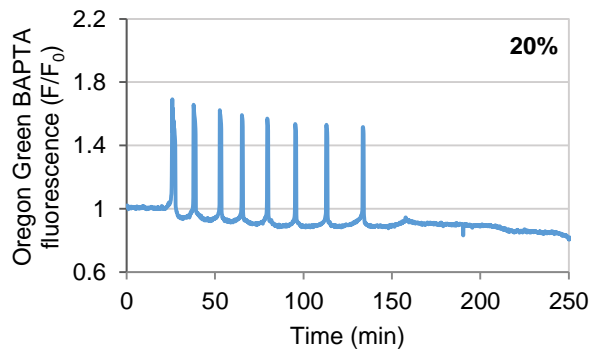

# Supplementary Figure S2

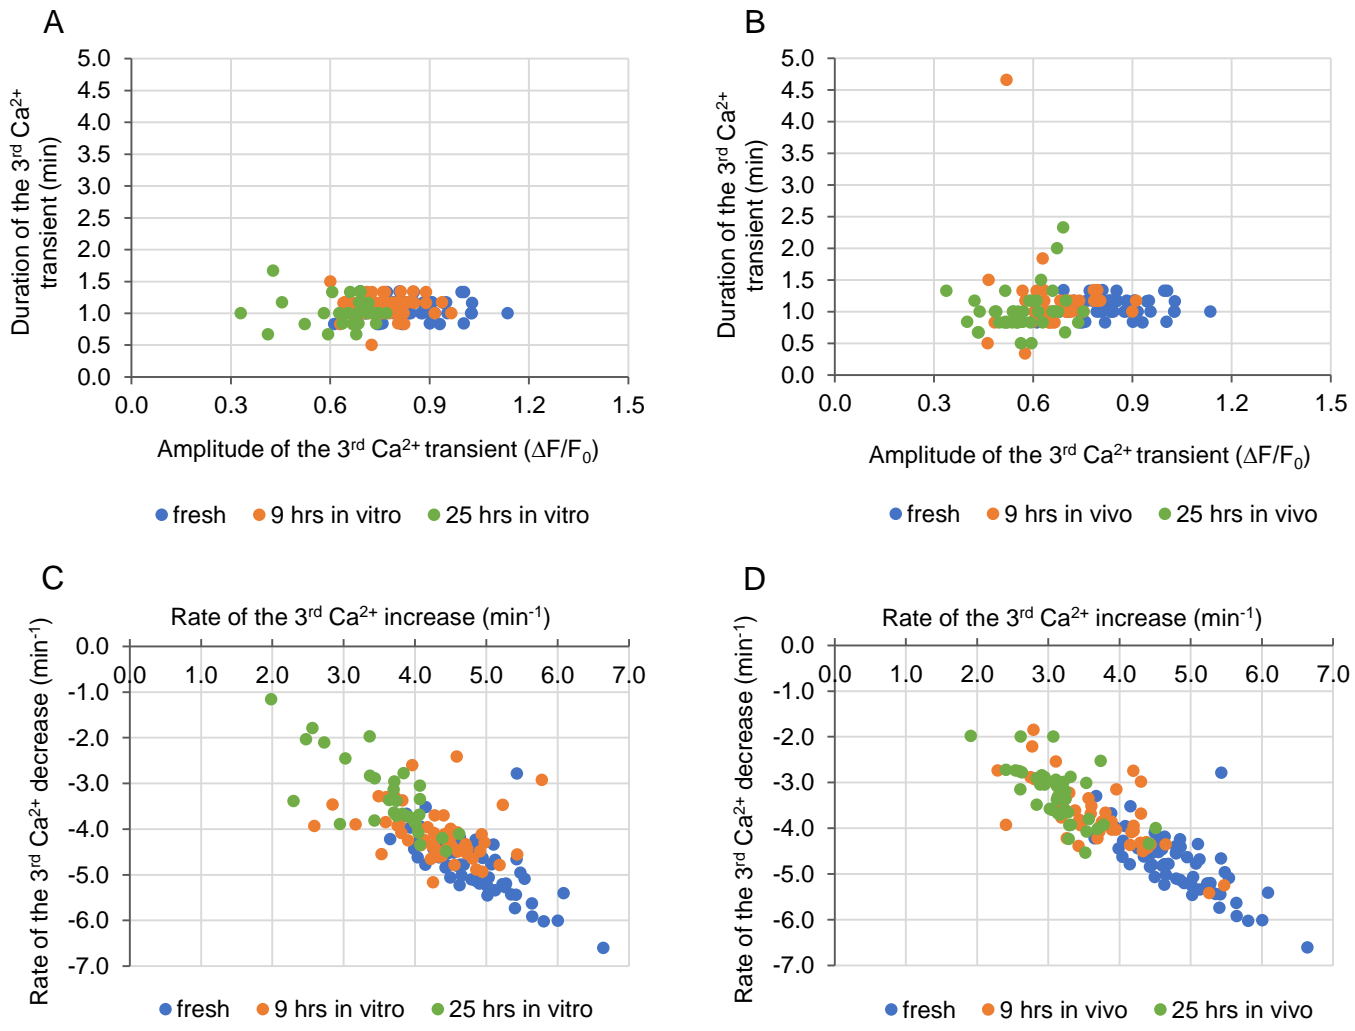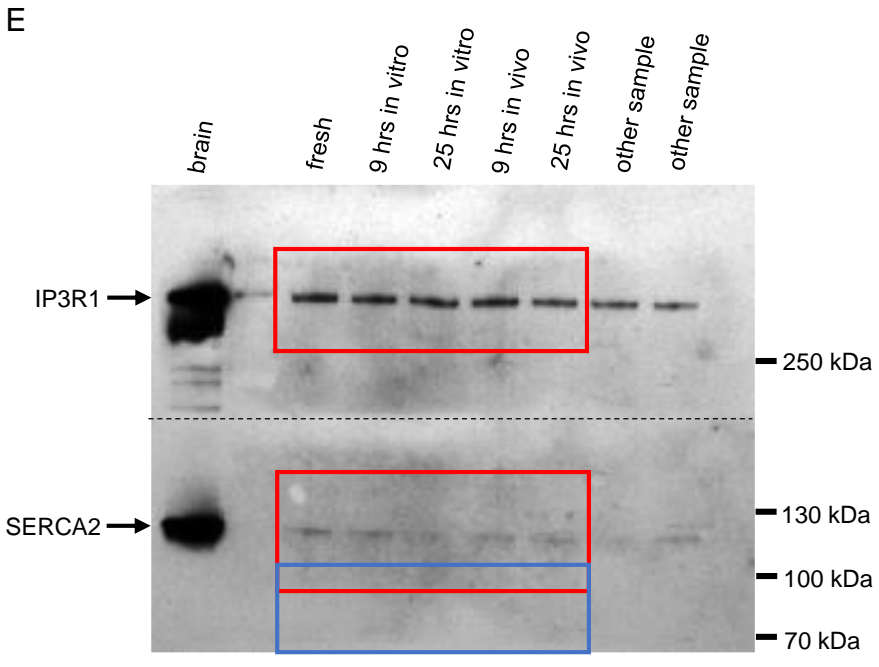



# Supplementary Figure S3

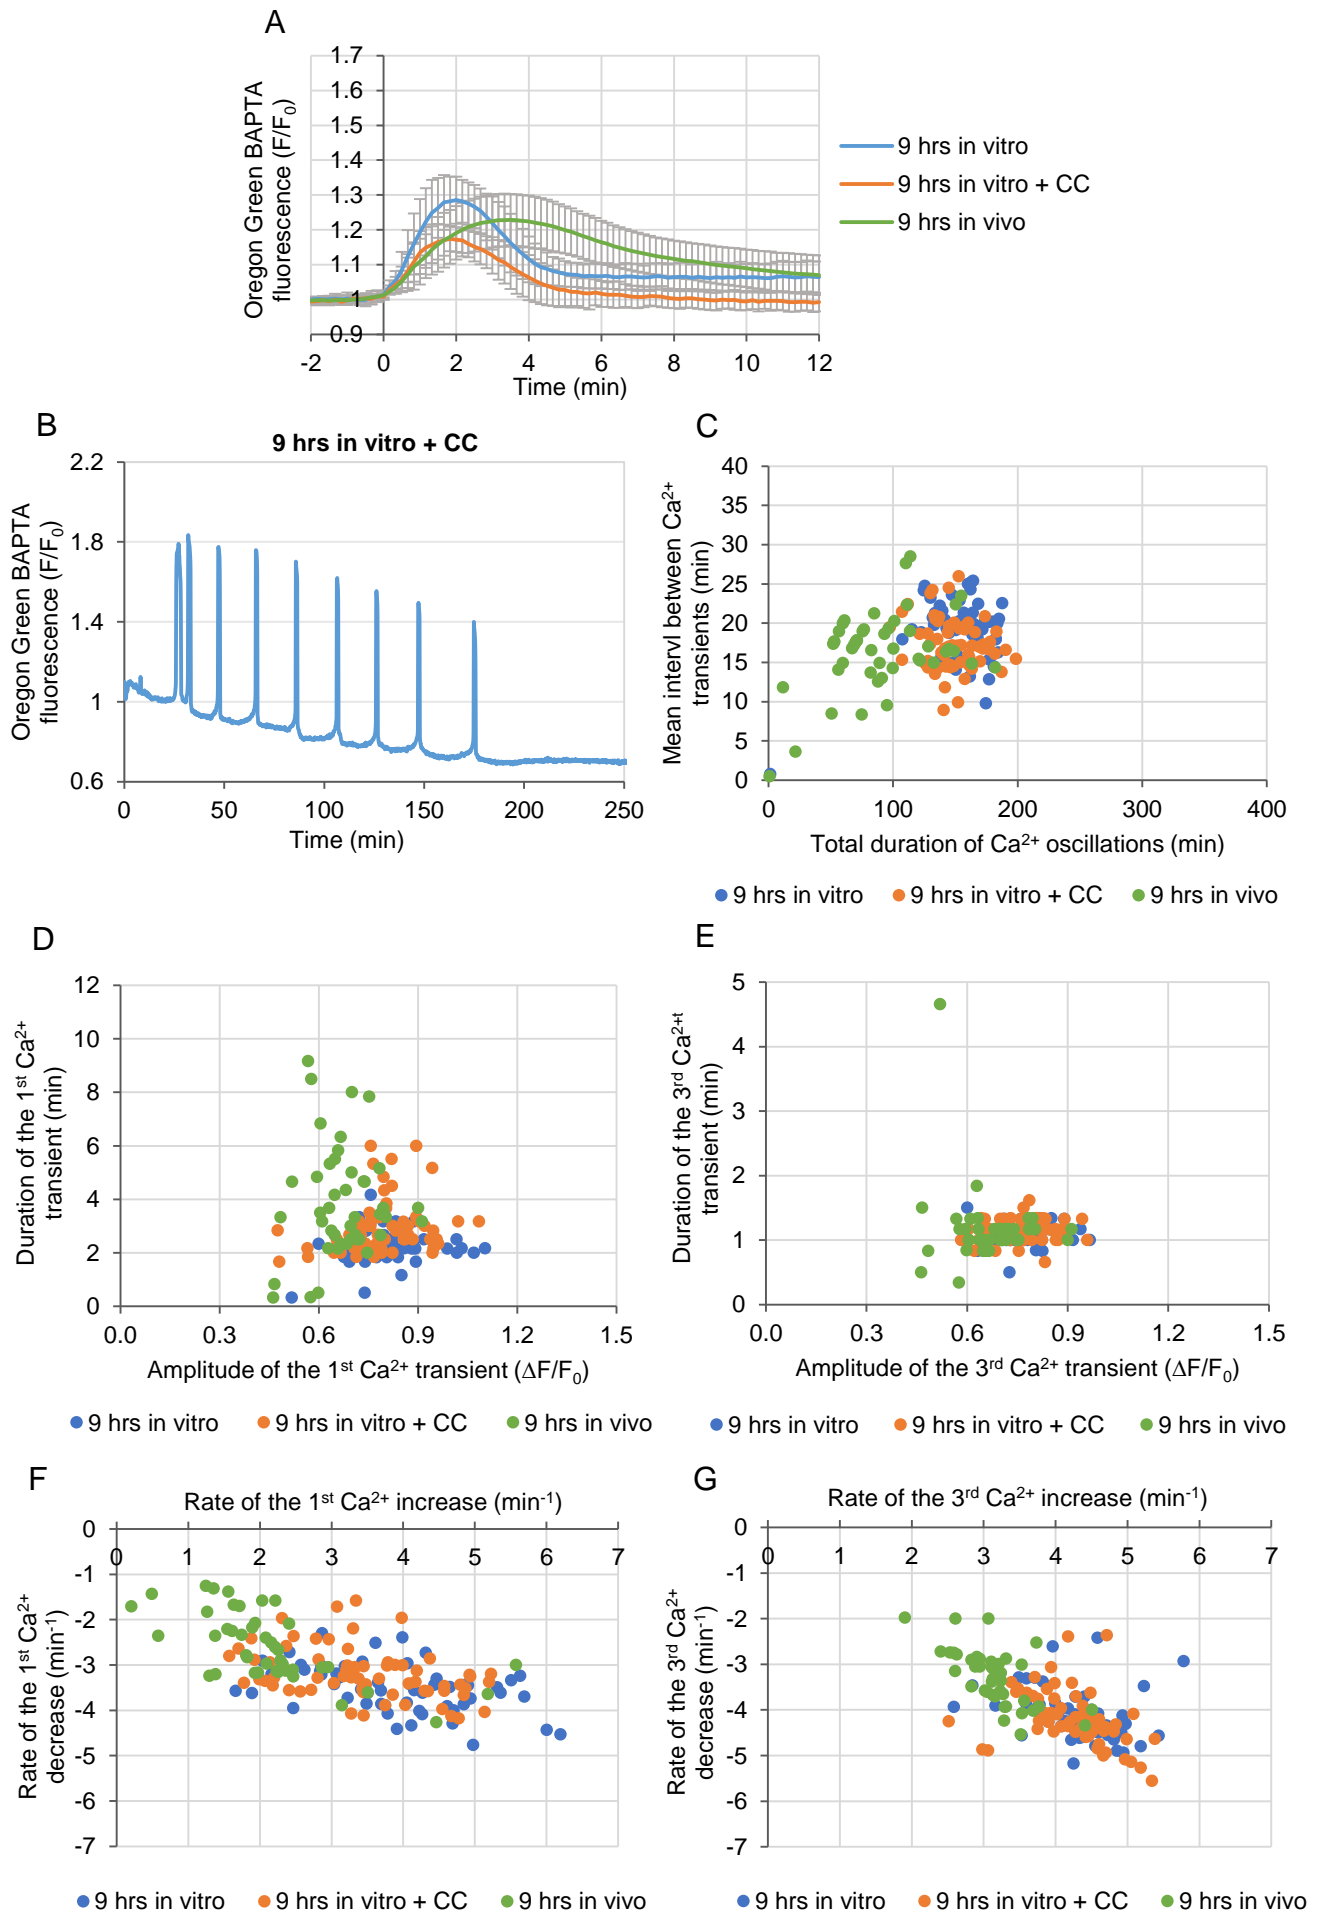

# Supplementary Figure S4

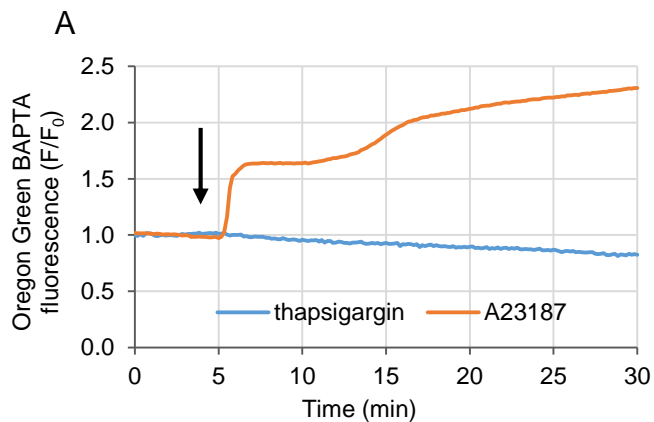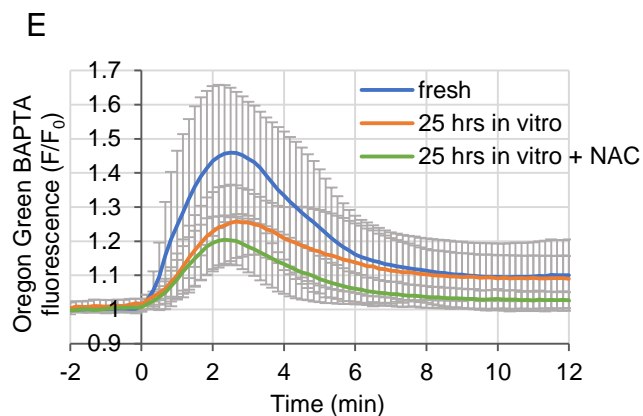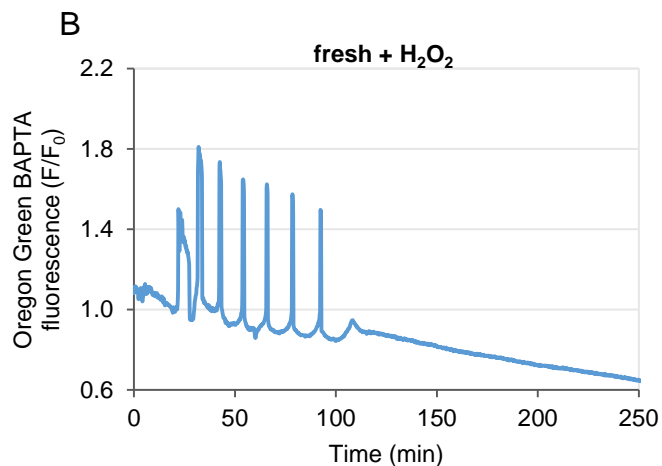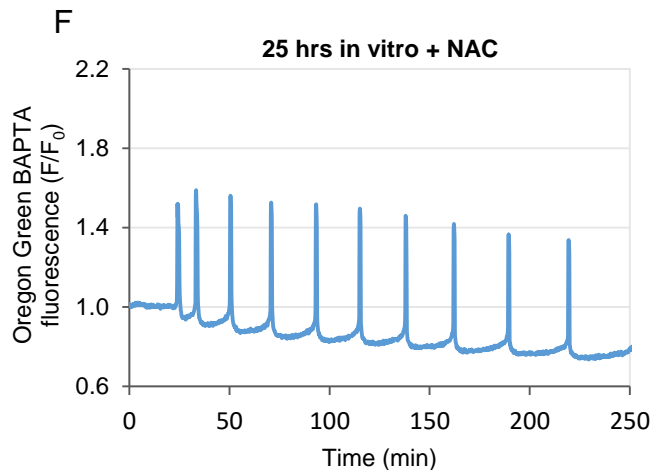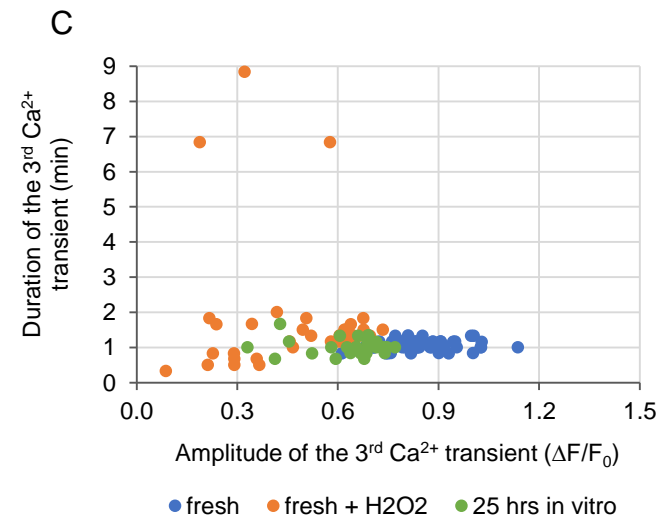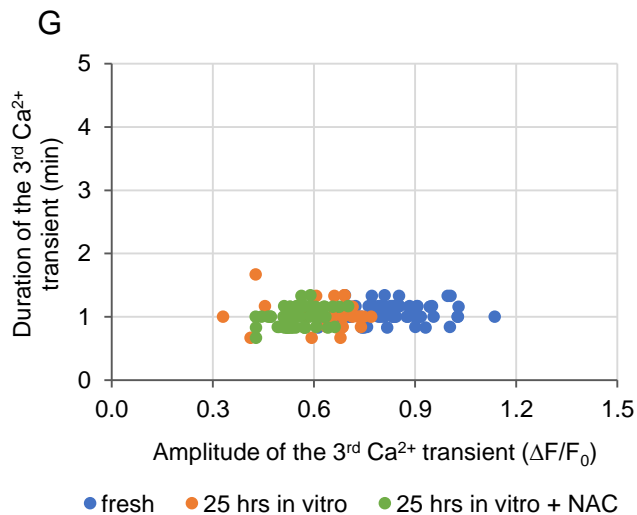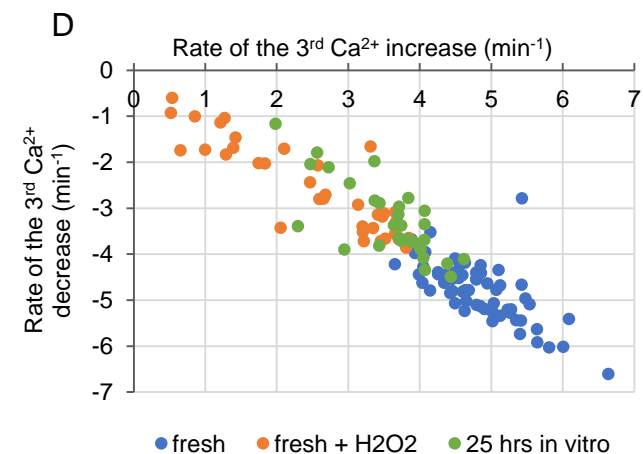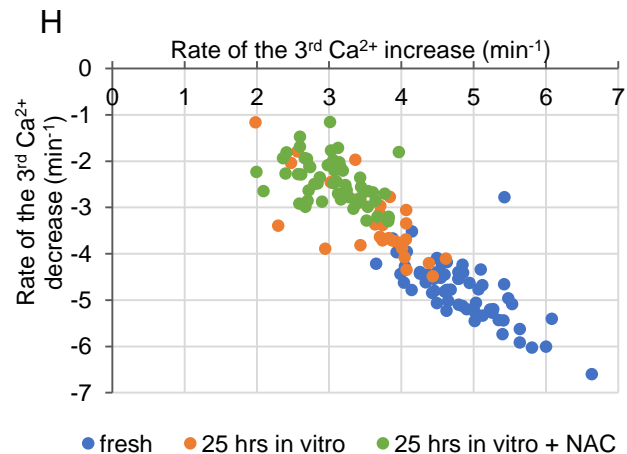

# Supplementary Figure S5

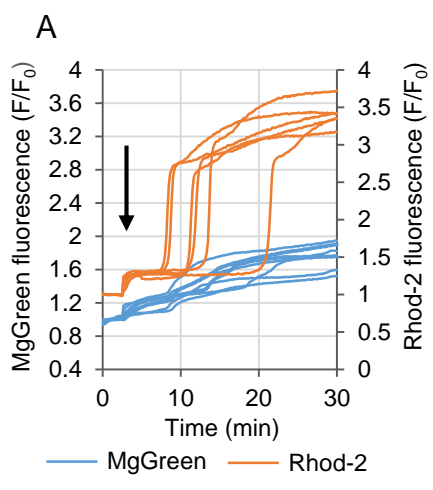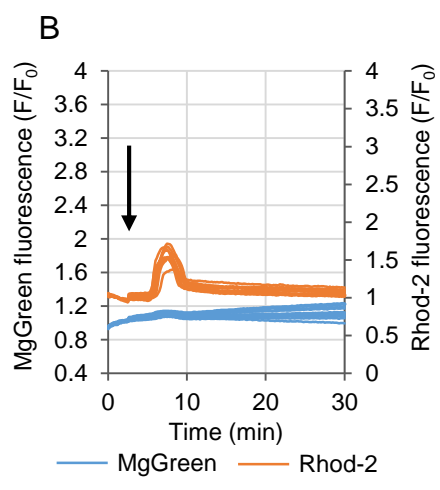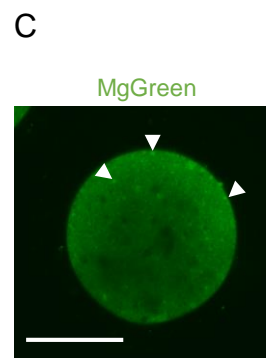

# Supplementary Figure S6

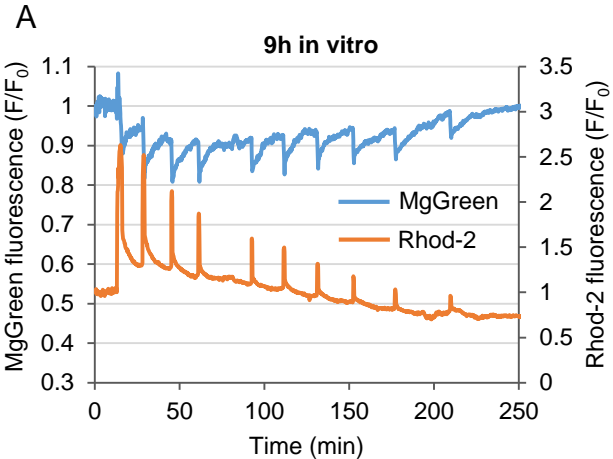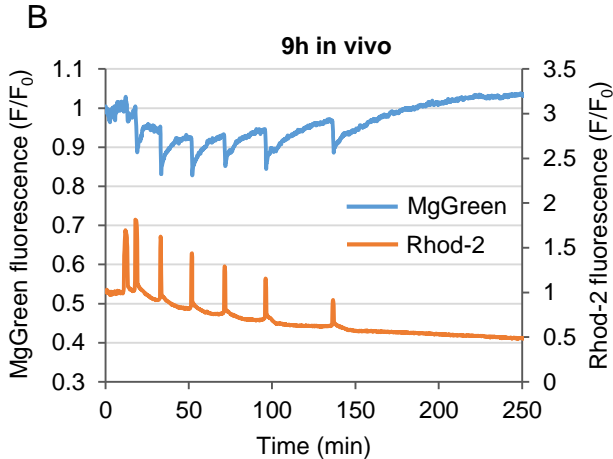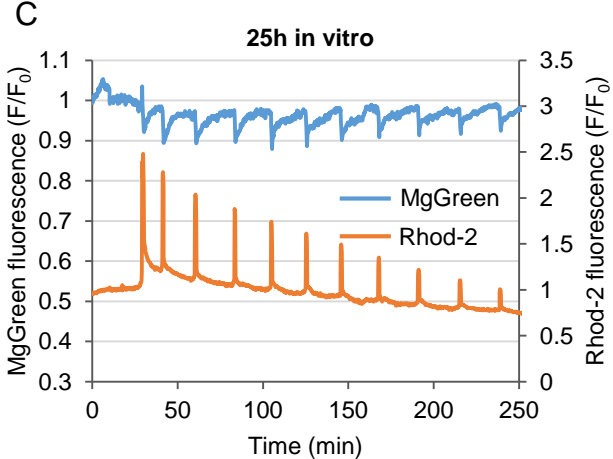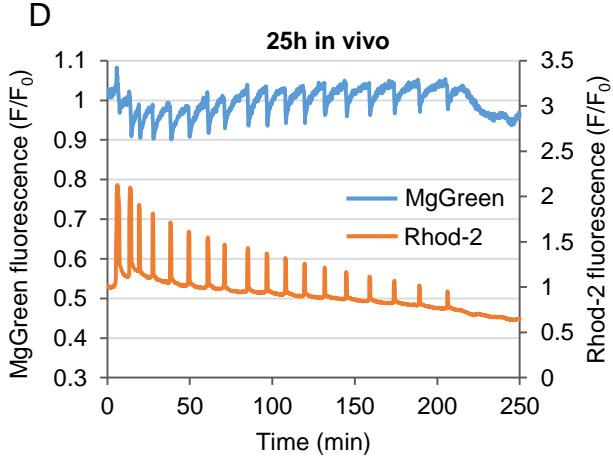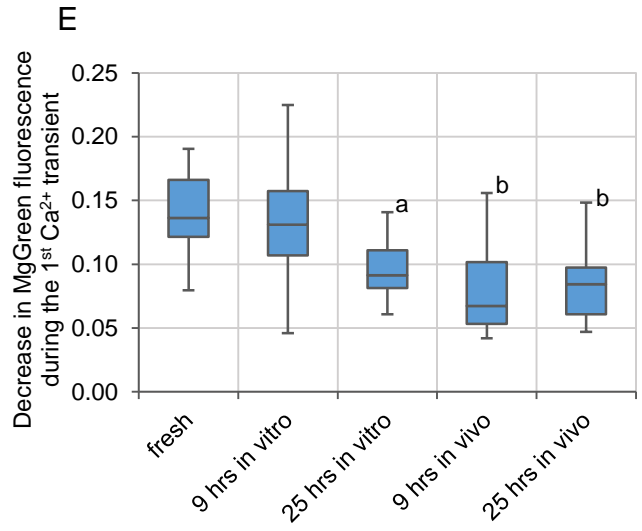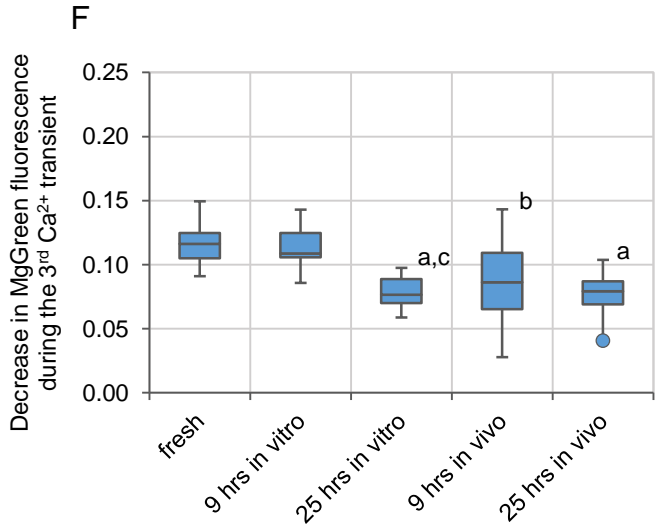

# Supplementary Figure S7

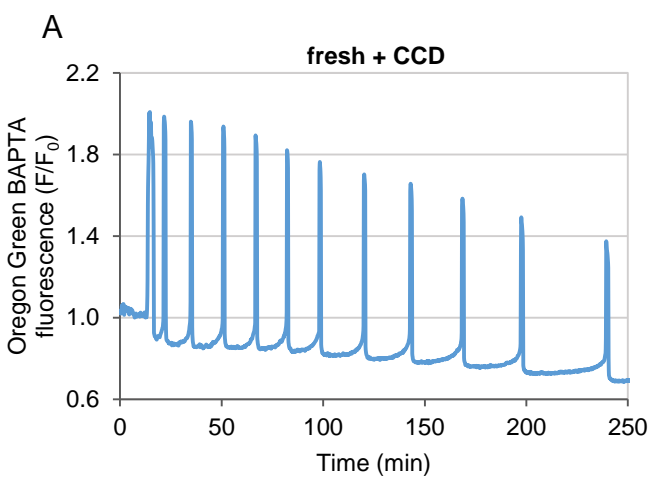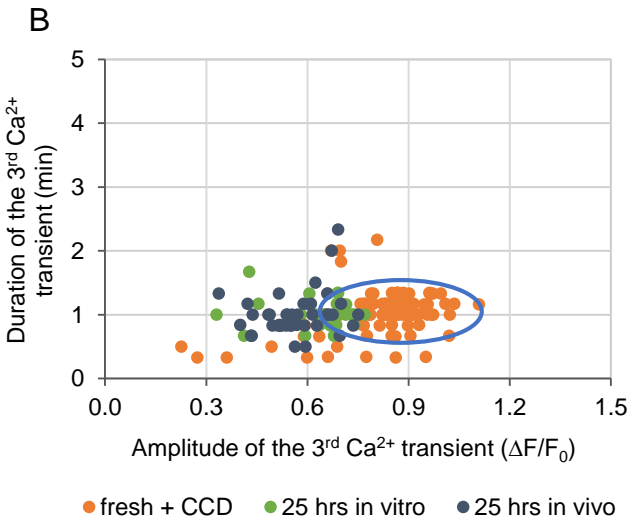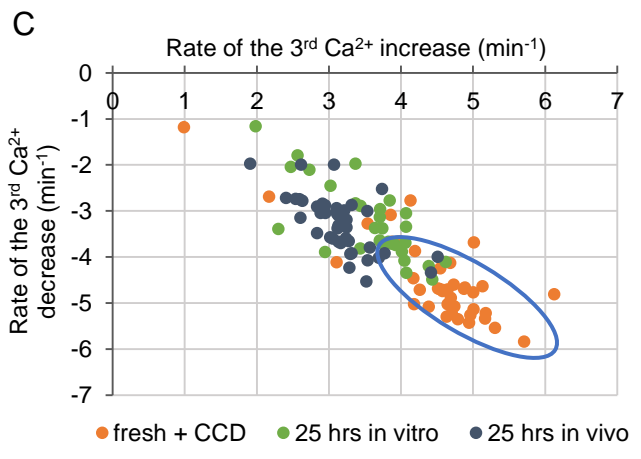

# Supplementary Figure S8

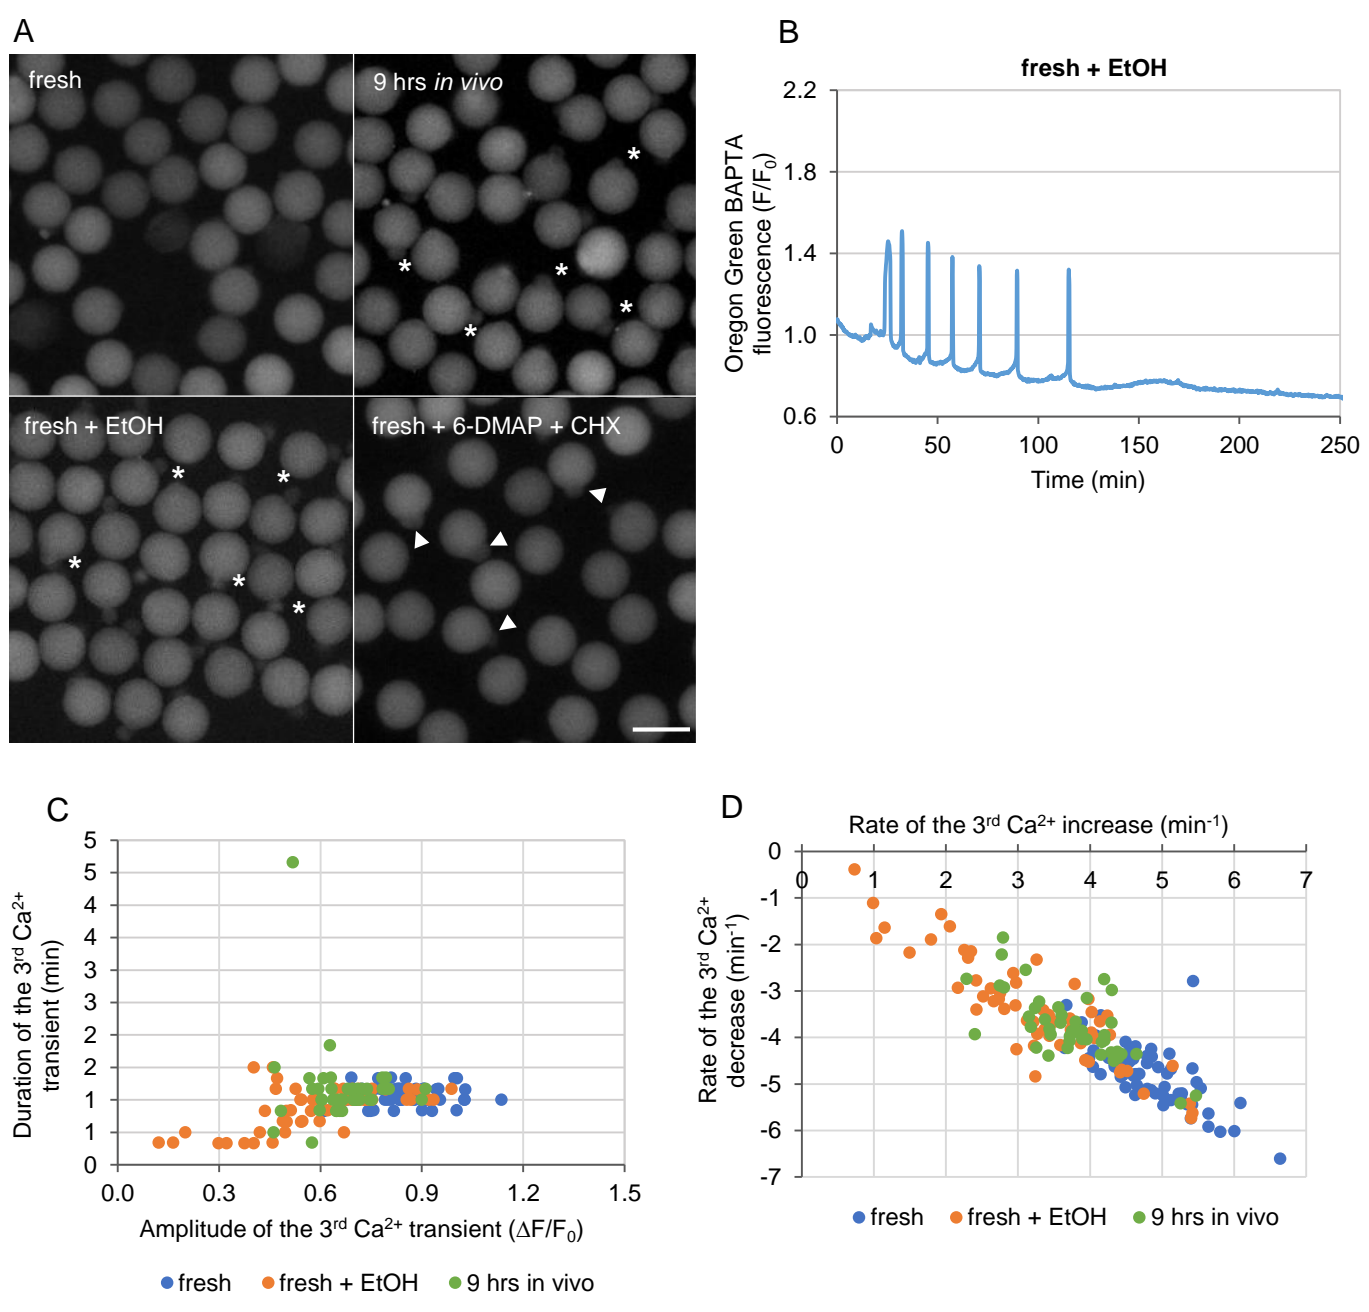

# Supplementary Figure S9

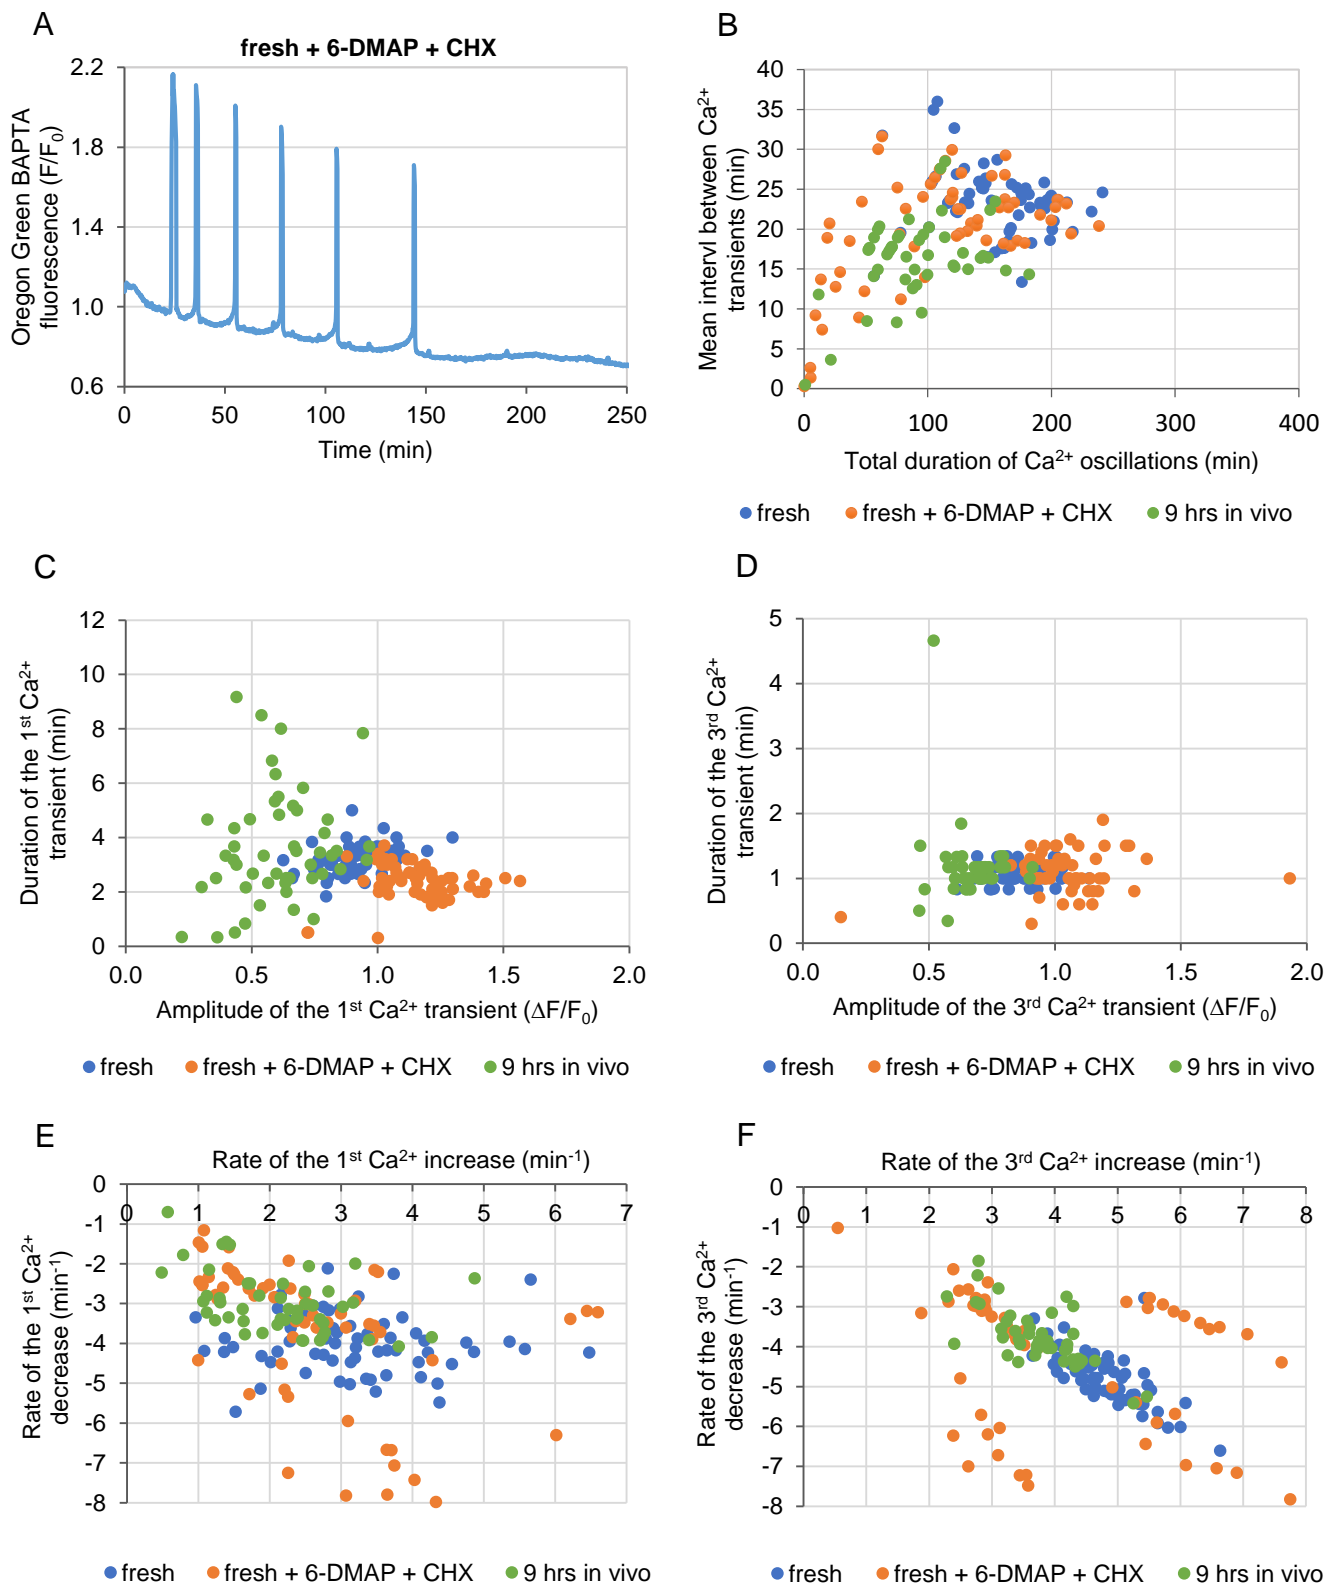

Supplement: 41598_2019_48281_MOESM1_ESM.pdf [file 41598_2019_48281_MOESM1_ESM.pdf]
